1                    **Biphasic unbinding of Zur from DNA for transcription (de)repression in Live Bacteria**

2  
3                    Won Jung and Peng Chen\*

4                    Department of Chemistry and Chemical Biology, Cornell University, Ithaca, New York  
5                    14853, USA

6  
7                    \* Correspondence author: pc252@cornell.edu

8  
9  
10  
11           **Abstract**

12                    Transcription regulator on-off binding to DNA constitutes a mechanistic paradigm in gene  
13 regulation, in which the repressors/activators bind to operator sites tightly while the corresponding non-  
14 repressors/non-activators do not. Another paradigm regards regulator unbinding from DNA to be a  
15 unimolecular process whose kinetics is independent of regulator concentration. Using single-molecule  
16 single-cell measurements, we find that the behaviors of the zinc-responsive uptake regulator Zur  
17 challenges these paradigms. Apo-Zur, a non-repressor and presumed non-DNA binder, can bind to  
18 chromosome tightly in live *E. coli* cells, likely at non-consensus sequence sites. Moreover, the  
19 unbinding from DNA of its apo-non-repressor and holo-repressor forms both show a biphasic,  
20 repressed-followed-by-facilitated kinetics with increasing cellular protein concentrations. The  
21 facilitated unbinding likely occurs via a ternary complex formation mechanism; the repressed unbinding  
22 is *first-of-its-kind* and likely results from protein oligomerization on chromosome, in which an inter-  
23 protein salt-bridge plays a key role. This biphasic unbinding could provide functional advantages in  
24 Zur's facile switching between repression and derepression.

25

## 26 INTRODUCTION

27 Transcriptional regulation in cells is generally orchestrated by regulators, which, upon binding  
28 to operator sites, either block the binding of RNA polymerase (RNAP) leading to repression (i.e.,  
29 repressors) or recruit RNAP leading to activation (i.e., activators)<sup>1,2</sup>. One mechanistic paradigm for  
30 these regulators is an on-off model in which they bind to their cognate operator sites tightly, while their  
31 corresponding non-repressor/non-activator forms have insignificant affinity to DNA and stay  
32 predominantly in the cytoplasm. Some exceptions recently emerged. For example, IscR, a member of  
33 the MarA/SoxS/Rob family of transcription regulators in *E. coli*, is a repressor in its holo-form (i.e.,  
34 containing a Fe-S cluster); its apo-form, generally thought to not bind DNA, was shown to bind DNA  
35 motifs different from its holo-repressor form<sup>3,4</sup>.

36 Derepression or deactivation subsequently comes from the unbinding of the regulator from the  
37 operator site. Here another mechanistic paradigm exists regarding the kinetics of regulator unbinding,  
38 which is presumed to be a unimolecular reaction (i.e., spontaneous unbinding), whose first-order rate  
39 constant is independent of surrounding regulator concentration. However, recent *in vitro* single-  
40 molecule and bulk measurements uncovered facilitated unbinding, in which the first-order unbinding  
41 rate constant increases with increasing protein concentrations<sup>5</sup>. These proteins include nucleoid  
42 associated proteins that bind double-stranded DNA nonspecifically<sup>6</sup>, replication protein A that binds  
43 single-stranded DNA nonspecifically<sup>7</sup>, and DNA polymerases<sup>8,9</sup>. We also discovered that CueR and  
44 ZntR, two MerR-family metal-sensing transcription regulators that bind to their cognate promoter  
45 sequences specifically, also show facilitated unbinding<sup>10</sup>. Using single-molecule tracking (SMT) and  
46 single cell quantification of protein concentration (SCQPC) that connect protein-DNA interaction  
47 kinetics with cellular protein concentrations quantitatively, we further showed that the facilitated  
48 unbinding of CueR and ZntR also operate in living *E. coli* cells<sup>11</sup>. A mechanistic consensus emerged,  
49 involving multivalent contacts between the protein and DNA<sup>5</sup>, which enables the formation of ternary  
50 complexes as intermediates that subsequently give rise to concentration-enhanced protein unbinding  
51 kinetics.

52 Here we report a SMT and SCQPC study of Zur, a Fur-family homodimeric zinc-uptake  
53 regulator, whose Zn<sup>2+</sup>-bound holo-form binds to its cognate operator site with nM affinity and represses  
54 the transcription of zinc uptake genes under zinc stress<sup>12-15</sup>; its apo-form is a non-repressor. We found  
55 that in living *E. coli* cells, Zur's interactions with DNA challenge the above two paradigms. First, apo-  
56 Zur, long thought to not bind DNA, can bind to chromosome tightly, likely at non-consensus sites.  
57 Second and more strikingly, the unbinding of both apo- and holo-Zur from chromosome not only show  
58 facilitated unbinding with increasing cellular protein concentrations, but also exhibit repressed  
59 unbinding at lower concentrations, giving a first-of-its-kind biphasic unbinding behavior. The repressed  
60 unbinding of Zur likely stems from Zur oligomerization on DNA, where an inter-dimer salt bridge plays  
61 a key role, and it likely facilitates transcription switching between repression and depression in cells.

62

## 63 RESULTS

### 64 SMT and SCQPC identify a tight DNA-binding state for both holo- and apo-Zur in cells

65 To visualize individual Zur proteins in *E. coli* cells, we fused the photoconvertible fluorescent  
66 protein mEos3.2<sup>16,17</sup> to its C-terminus creating Zur<sup>mE</sup>, either at its chromosomal locus to have  
67 physiological expression or in an inducible plasmid in a  $\Delta zur$  deletion strain to have a wider range of  
68 cellular protein concentrations (Methods). This Zur<sup>mE</sup> fusion-protein is intact and as functional a  
69 repressor as the wild-type (WT) in the cell under Zn stress growth conditions (Supplementary Fig. 1a-  
70 b).

71 Using sparse photoconversion and time-lapse stroboscopic imaging, we tracked the motions  
72 of photoconverted Zur<sup>mE</sup> proteins individually in single *E. coli* cells at tens of nanometer precision until  
73 their mEos3.2 tags photobleached (Fig. 1a). This SMT allows for measuring Zur<sup>mE</sup>'s mobility, which  
74 reports on whether the molecule is freely diffusing in the cell or bound to DNA. We repeated this

75 photoconversion and SMT cycle 500 times for each cell, during which we counted the number of  
76 tracked protein molecules. We then used the SCQPC protocol to quantify the remaining number of  
77 Zur<sup>mE</sup> protein molecules in the same cell<sup>11</sup>, eventually determining the Zur<sup>mE</sup> concentration in each cell  
78 (i.e., [Zur<sup>mE</sup>]<sub>cell</sub>). This single-cell protein quantitation allowed for sorting the cells into groups of similar  
79 protein concentrations and subsequently examining protein-concentration-dependent processes,  
80 without being limited by the large cell-to-cell heterogeneity in protein expression.

81 We first examined Zur<sup>mE</sup><sub>apo</sub> whose regulatory Zn-binding site was mutated (i.e., C88S) to make  
82 it permanent apo and a non-repressor<sup>15</sup> (Supplementary Fig. 1b). To quantify its mobility in cells, we  
83 determined the distribution of its displacement length  $r$  between successive images and the  
84 corresponding cumulative distribution function (CDF) of  $r$  for each cell group having similar cellular  
85 Zur<sup>mE</sup><sub>apo</sub> concentrations (Fig. 1b-c). Global analysis of these CDFs across all cellular protein  
86 concentrations resolved minimally three Brownian diffusion states with *effective* diffusion constants of  
87  $\sim 5.0 \pm 0.5$ ,  $0.82 \pm 0.05$ , and  $0.040 \pm 0.003 \mu\text{m}^2 \text{s}^{-1}$  (Fig. 1b-c; Methods). No subcellular localization or  
88 protein aggregation was observed; therefore, these two aspects are not the reasons for the presence of  
89 these three diffusion states. On the basis of their diffusion constants and previous studies of transcription  
90 regulator diffusion in *E. coli* cells<sup>11, 18-21</sup>, we assigned the fastest diffusion state as Zur<sup>mE</sup><sub>apo</sub> proteins freely  
91 diffusing (FD) in the cytoplasm, the medium diffusion state as those nonspecifically bound (NB) to and  
92 moving on chromosome, and the slowest state as those tightly bound (TB) to the chromosome, whose  
93 small effective diffusion constant ( $\sim 0.040 \mu\text{m}^2 \text{s}^{-1}$ ) reflects chromosome dynamics<sup>19, 22</sup> and  
94 measurement uncertainties. Control measurements on the free mEos3.2 further support the assignment  
95 of the FD state, as we reported<sup>11</sup>.

96 The resolution of CDFs of  $r$  also gave the fractional populations of the three states across the  
97 range of cellular protein concentrations (Fig. 1d). With increasing [Zur<sup>mE</sup><sub>apo</sub>]<sub>cell</sub>, the fractional population  
98 of the FD state increases, while that of the TB state decreases. These trends further support their  
99 assignments because, with increasing cellular protein concentrations, more proteins compete for the  
100 limited number of tight binding sites on chromosome, leading to smaller fractional populations of the  
101 TB state and larger fractions of the FD state.

102 The presence of a significant fraction of the tight DNA-binding state, even at low cellular  
103 protein concentrations, is surprising for Zur<sup>mE</sup><sub>apo</sub> (e.g.,  $\sim 32\%$  at [Zur<sup>mE</sup><sub>apo</sub>]<sub>cell</sub>  $\sim 60$  nM; 1 nM in an *E. coli*  
104 cell corresponds to  $\sim 1$  protein copy), as apo-Zur is a non-repressor. Furthermore, previous gel shift  
105 assay showed that *E. coli* apo-Zur does not bind to operator sites (i.e.,  $K_D > 300$  nM at the *znuABC*  
106 promoter)<sup>15</sup>, and for *B. subtilis*, its apo-Zur's binding affinity to operator sites is  $\sim 1000$  times weaker  
107 than its holo-form<sup>23</sup>. We hypothesized that the TB state of Zur<sup>mE</sup><sub>apo</sub> likely comes from its binding to non-  
108 operator sites (i.e., non-consensus sequence sites; see later).

109 We next examined Zur<sup>mE</sup> in cells stressed with  $20 \mu\text{M}$  Zn<sup>2+</sup> in the medium. This Zn<sup>2+</sup>  
110 concentration can evoke maximal repression of *zur* regulons (Supplementary Note 2.3). Therefore, most  
111 of Zur proteins in the cell should be metallated, mimicking the holo repressor form (i.e., Zur<sup>mE</sup><sub>Zn</sub>). The  
112 same three diffusion states are resolved in the CDFs of  $r$  across all cellular protein concentrations  
113 (Supplementary Note 4.2). In contrast to the case for Zur<sup>mE</sup><sub>apo</sub>, the TB state of Zur<sup>mE</sup><sub>Zn</sub> is expected here  
114 because holo-Zur binds specifically to consensus operator sites within Zur-regulated promoters.  
115 Expectedly, the fractional population of the FD state of Zur<sup>mE</sup><sub>Zn</sub> increases with increasing [Zur<sup>mE</sup><sub>Zn</sub>]<sub>cell</sub>,  
116 whereas that of the TB state decreases (Fig. 1d).

### 117 **Concentration-dependent biphasic unbinding kinetics of Zur from DNA**

118 To probe Zur-DNA interaction dynamics, we examined the  $r$  versus time  $t$  trajectories of  
119 individual Zur proteins inside cells. These trajectories show clear transitions between large and small  $r$   
120 values (Fig. 2a): the small  $r$  values are expected to be dominated by instances of Zur tightly bound to  
121 chromosome (i.e., TB state). We set an upper threshold  $r_0$  ( $= 0.2 \mu\text{m}$ ), below which  $>99.5\%$  of the TB

122 states are included based on the resolved distributions of  $r$  (Fig. 1b), to select these small displacements  
123 and obtain estimates of the individual residence time  $\tau$  of a single Zur protein at a chromosomal tight  
124 binding site (Fig. 2a). Each  $\tau$  starts when  $r$  drops below  $r_0$  and ends when  $r$  jumps above  $r_0$  (e.g.,  $\tau$ 's in  
125 Fig. 2a), which are expected to reflect dominantly protein unbinding from DNA, or when the mEos3.2-  
126 tag photobleaches/blinks.

127 We analyzed trajectories from many cells of similar cellular Zur concentrations to obtain their  
128 corresponding distribution of  $\tau$  (Fig. 2b). We used a quantitative three-state model (i.e., FD, NB, and  
129 TB states; Fig. 2c) to analyze the distribution of  $\tau$ , in which the contributions of FD and NB states are  
130 deconvoluted (Eq. (4); approximations and validations of this model in Supplementary Note 5)<sup>11</sup>. This  
131 model also accounts for mE photobleaching/blinking kinetics, determined from the fluorescence on-  
132 time distribution of SMT trajectories (Supplementary Fig. 8). This analysis gave  $k_d$ , the apparent first-  
133 order unbinding rate constant of Zur from a tight binding site on the chromosome, for each group of  
134 cells having similar cellular Zur concentrations.

135 Strikingly,  $k_d$  for  $Zur_{apo}^{mE}$  shows a biphasic, repressed-followed-by-facilitated behavior: it  
136 initially decreases with increasing free (or total) cellular Zur concentration (i.e., repressed), reaching a  
137 minimum at  $\sim 130$  nM; it then increases toward higher protein concentrations (i.e., facilitated; Fig. 2d,  
138 left, blue points). This biphasic behavior is also apparent in the simple averages of residence time  $\langle \tau \rangle$  or  
139 by analyzing the distributions of  $\tau$  that merely takes into account mE photobleaching/blinking  
140 (Supplementary Fig. 9a). The facilitated unbinding of  $Zur_{apo}^{mE}$  is analogous to those of CueR and ZntR,  
141 two MerR-family metalloregulators that we discovered *in vitro* and in living cells<sup>10, 11</sup>; the repressed  
142 unbinding of  $Zur_{apo}^{mE}$  is a *first-of-its-kind* discovery, however.

143 In contrast,  $k_d$  for  $Zur_{Zn}^{mE}$  only shows the facilitated unbinding within the accessible cellular  
144 protein concentration range ( $\sim 30$  to  $\sim 900$  nM) — it increases consistently with increasing cellular  
145 protein concentrations (Fig. 2d, left, red points). The different behaviors of  $Zur_{Zn}^{mE}$  from that of  $Zur_{apo}^{mE}$   
146 indicate that we could indeed observe the behaviors of the holo-repressor.

## 147 Mechanism of biphasic unbinding of Zur from DNA

148 Amid the biphasic unbinding of Zur from DNA (Fig. 2d, left), the concentration-facilitated  
149 unbinding at higher protein concentrations is analogous to those of CueR and ZntR<sup>11</sup>. There it stems  
150 from an assisted dissociation pathway, in which an incoming protein from solution helps an incumbent  
151 protein on DNA to unbind, or a direct substitution pathway, in which the incoming protein directly  
152 replaces the incumbent one (Fig. 2e, lower)<sup>10, 11</sup>. The rates of both pathways depend linearly on the free  
153 protein concentration, and both likely occur through a common ternary protein<sub>2</sub>-DNA complex, in  
154 which the two homodimeric proteins each use one DNA-binding domain to bind to half of the dyad  
155 recognition sequence<sup>5, 24</sup>. As Zur is also a homodimer, Zur also could form this ternary complex and  
156 undergo assisted dissociation or direct substitution, leading to its concentration-facilitated unbinding  
157 from DNA.

158 Regarding the repressed unbinding of apo-Zur in the lower concentration regime, we propose  
159 that it likely results from protein oligomerization around the DNA binding site, in which the number of  
160 proteins in the oligomer increases with increasing protein concentration and the resulting protein-  
161 protein interactions contribute to additional stabilization, thereby repressing protein unbinding rate (Fig.  
162 2e, upper). (The facilitated unbinding later takes over when the protein concentration reaches a high  
163 enough level.) Two evidences support our oligomerization proposal: (1) Crystallography showed that  
164 two *E. coli* Zur dimers can bind to a short cognate DNA sequence<sup>15</sup>. (2) DNA footprinting showed that  
165 *S. coelicolor* Zur forms oligomers around its recognition sites, containing greater than 4 dimers<sup>25</sup>.

166 To further support this oligomerization proposal, we examined the spatial distribution in the  
167 cell of Zur's residence sites at its TB state; these residence sites correspond to the  $r_0$ -thresholded small  
168 displacements (Fig. 2a; Supplementary Note 8). For comparison, we further simulated an equal number  
169 of sites randomly distributed in a cell of the same size (Supplementary Note 8.1). We then examined

170 their pair-wise distance distributions (PWD), in which Zur oligomerization at chromosomal binding  
 171 sites should lead to more populations at shorter pair-wise distances. This PWD for  $Zur_{apo}^{mE}$  indeed shows  
 172 a higher population at distances shorter than  $\sim 500$  nm relative to the simulated random sites (Fig. 3a).  
 173 However, at the distance scale of a few hundred nanometers, the compaction of chromosome also  
 174 contributes to the PWD of residence sites<sup>11</sup>. To decouple the contribution of protein oligomerization  
 175 from chromosome compaction, we examined the fraction of residence sites within a radius threshold  $R$ .  
 176 At small  $R$  (e.g.,  $<100$  nm), the contribution of Zur oligomerization to this fraction should dominate  
 177 over chromosome compaction, as oligomerization is at molecular scale whereas the most compact  
 178 chromosome in a *E. coli* cell is still around hundreds of nanometer in dimension<sup>11, 26</sup>. At any specified  
 179  $R$  (e.g., 200 nm), the fraction of  $Zur_{apo}^{mE}$  residence sites within the radius  $R$  increases expectedly with  
 180 increasing cellular protein concentrations (Fig. 3b, red points), because higher protein concentrations  
 181 gave higher sampling frequency of residence sites. More important, at lower  $R$  (e.g., 100 nm), the  
 182 fraction of  $Zur_{apo}^{mE}$  residence sites is larger than that of simulated random sites (Fig 3b, red vs. blue  
 183 points), and their ratio is larger at lower protein concentrations (Fig. 3b, green points). The average ratio  
 184 of the fraction of  $Zur_{apo}^{mE}$  residence sites over that of the simulated random sites is always greater than  
 185 1, and it becomes larger at smaller  $R$  down to  $<70$  nm (Fig. 3c; note our molecular localization precision  
 186 is  $\sim 20$  nm; Supplementary Note 3), supporting  $Zur_{apo}^{mE}$  oligomerization at chromosomal tight binding  
 187 sites at the nanometer scale.

188 We formulated a quantitative kinetic model to describe the biphasic unbinding of  $Zur_{apo}^{mE}$ . It  
 189 considers both oligomerization at a TB site and facilitated unbinding via a ternary protein<sub>2</sub>-DNA  
 190 complex (Fig. 2c and e; Supplementary Note 6). The microscopic unbinding rate constant  $k_d^{(n)}$  from a  
 191 TB site with  $n$   $Zur_{apo}^{mE}$  dimers bound as an oligomer comprises three terms:

$$k_d^{(n)} = k_o + k_r \alpha^n + k_f [P]_{FD} \quad (1)$$

192  $k_o$  is a first-order intrinsic unbinding rate constant. The  $k_r \alpha^n$  term accounts for the repressed unbinding  
 193 from protein oligomerization, where a first-order rate constant  $k_r$  is attenuated by the factor  $\alpha$  ( $0 < \alpha < 1$ )  
 194 to the exponent of  $n$ , which depends on the cellular protein concentration and has a maximal value  
 195 of  $n_0$ , the oligomerization number. The third term describes the facilitated unbinding, with  $k_f$  being a  
 196 second-order rate constant and  $[P]_{FD}$  being the concentration of freely diffusing Zur dimers in the cell,  
 197 as reported for CueR/ ZntR<sup>11</sup>. In the limit of weak oligomerization and low free protein concentrations,  
 198 the apparent unbinding rate constant  $k_d$  from any TB site is:

$$k_d = \langle k_d^{(n)} \rangle = k_o^{off} + k_r \left( e^{-[P]_{FD}/K_m} - 1 \right) + k_f [P]_{FD} \quad (2)$$

199  $K_m = \frac{k_o^{off}}{k_1(1-\alpha)}$ , it has the units of protein concentration, reflecting the effective dissociation constant of the  
 200 protein oligomer on the chromosome.  $k_o^{off} = k_o + k_r$ ; it is a first-order spontaneous unbinding rate  
 201 constant at the limit of zero cellular protein concentration. Equation (2) satisfactorily fits the biphasic  
 202 unbinding kinetics of  $Zur_{apo}^{mE}$  (Fig. 2d, left), giving the associated kinetic parameters (Table 1 and  
 203 Supplementary Table 6). In particular,  $K_m$  of  $Zur_{apo}^{mE}$  is  $\sim 5$  nM, indicating that apo-Zur can oligomerize  
 204 on chromosome at its physiological concentrations in the cells (Fig. 4a).

205 The same model also allowed for analyzing the relative populations of FD, NB, and TB states  
 206 of Zur across all cellular protein concentrations, giving additional thermodynamic and kinetic  
 207 parameters (Table 1, and Supplementary Table 6). Strikingly, the dissociation constant  $K_{d1}$  of  $Zur_{apo}^{mE}$  at  
 208 TB sites of DNA is  $\sim 11$  nM, merely  $\sim 2$  times weaker than that of  $Zur_{Zn}^{mE}$  ( $K_{d1} \sim 5$  nM). This is *not*  
 209 expected because apo-Zur, in both *E. coli* and *B. subtilis*, was shown to have no significant affinity to  
 210 the consensus sites recognized by holo-Zur<sup>15, 23</sup>. Therefore, the high affinity of  $Zur_{apo}^{mE}$  at the TB state  
 211 suggests that inside cells, apo-Zur likely bind tightly to other, non-consensus sites in the chromosome.



212 This likelihood is supported by a ChIP-seq analysis in *B. subtilis*, which showed Zur can bind tightly to  
213 many locations in the chromosome that do not share consensus with the known recognition sites  
214 (although it was undefined whether the detected bindings there were by apo- or holo-Zur)<sup>27</sup>.

### 215 **Molecular basis of repressed unbinding**

216 Our model of Zur oligomerization at TB sites was based partly on the structure of two holo-Zur  
217 dimers bound to a cognate DNA, which showed two inter-dimer D49–R52 salt bridges<sup>15</sup>. To probe the  
218 role of these salt bridges in Zur oligomerization, we made the D49A mutation, known to disrupt the  
219 interactions<sup>15</sup>. For apo-Zur, the resulting mutant Zur<sub>apo, D49A</sub><sup>mE</sup> still exhibits the biphasic unbinding  
220 behavior, however the minimum of the apparent unbinding rate constant  $k_d$  shifted to a higher cellular  
221 protein concentration (Fig. 2d, right). Its  $K_m$  is  $16.2 \pm 7.5$  nM, three times larger than that of Zur<sub>apo</sub><sup>mE</sup>  
222 (Table 1), indicating a weakened oligomerization affinity and thus a significant role of these salt bridges.

223 More strikingly, for Zur<sub>Zn</sub><sup>mE</sup>, which only showed facilitated unbinding (Fig. 2d, left), the  
224 resulting mutant Zur<sub>Zn, D49A</sub><sup>mE</sup> clearly shows biphasic unbinding with  $K_m = 3.2 \pm 1.9$  nM (Fig. 2d, right;  
225 Table 1). Therefore, holo-Zur also possesses repressed unbinding kinetics — it was invisible for Zur<sub>Zn</sub><sup>mE</sup>  
226 likely because its  $K_m$  is smaller than the low limit of accessible cellular protein concentrations (~3 nM),  
227 but emerges after the D49A mutation, which further supports the importance of the salt bridges in Zur  
228 oligomerization and repressed unbinding behaviors.

229

## 230 **DISCUSSION**

231 We have uncovered that the Fur-family Zn<sup>2+</sup>-sensing transcription regulator Zur exhibits two  
232 unusual behaviors that challenge conventional paradigms of regulator-chromosome interactions. First,  
233 apo-Zur, the non-repressor form and a long-presumed non-DNA binder, can actually bind to  
234 chromosome tightly, likely at different locations from the consensus sequence recognized by holo-Zur,  
235 the repressor form. This tight chromosome binding by apo-Zur challenges the paradigm of regulator  
236 on-off model for transcription repression (or activation)<sup>1,2</sup>. Second, the unbinding kinetics of both apo-  
237 and holo-Zur not only exhibit facilitated unbinding, a newly discovered phenomenon for a few DNA-  
238 binding proteins<sup>6, 7, 9, 28</sup>, but also show repressed unbinding, a *first-of-its-kind* phenomenon that likely  
239 results from Zur oligomerization on chromosome, facilitated by inter-dimer salt bridges. Overall, Zur  
240 has biphasic unbinding kinetics from chromosome with increasing cellular protein concentrations,  
241 which challenges the paradigm of protein unbinding being typically unimolecular processes whose first-  
242 order rate constants do not depend on the protein concentration.

243 To probe whether the biphasic unbinding of Zur occurs within the physiological cellular protein  
244 concentrations, we quantified cellular Zur<sup>mE</sup> concentration when it is encoded only at the chromosomal  
245 locus (Fig. 4a). In minimal medium without Zn stress, the cellular Zur<sup>mE</sup>, which is mostly in the apo-  
246 form, ranges from ~24 to 108 nM (mean =  $50 \pm 14$  nM), within which apo-Zur unbinding from TB sites  
247 is in the repressed unbinding regime and slows down by ~42% from the lowest to the highest protein  
248 concentration (Fig. 4b). When stressed by 20  $\mu$ M Zn<sup>2+</sup>, the cellular Zur<sup>mE</sup>, now mostly in the holo-form,  
249 ranges from ~26 to 124 nM (mean =  $63 \pm 20$  nM), reflecting an average of ~28% protein concentration  
250 increase induced by Zn stress. In this protein concentration range, holo-Zur is already in the facilitated  
251 unbinding regime, and its unbinding rate from a recognition site can increase by ~36% (Fig. 4b).

252 Within the physiological protein concentration range, the opposite dependences of unbinding  
253 kinetics on the cellular protein concentration between apo- and holo-Zur could provide functional  
254 advantages for an *E. coli* cell to repress or de-repress Zn uptake genes. When cell encounters  
255 environmental Zn stress that demands strong repression of Zn uptake, the cellular concentration of Zur  
256 swings upward and it becomes dominantly in the holo-repressor form. The unbinding of holo-repressor  
257 from recognition sites could be facilitated by its increasing concentration (Fig. 5a), but the facilitated  
258 unbinding via direct substitution by another holo-repressor has no functional consequence while

259 facilitated unbinding via assisted dissociation will be immediately compensated by a rebinding of a  
260 holo-repressor (the rebinding would occur within  $\sim 0.014$  s; Supplementary Note 7). For those cellular  
261 Zur in the apo non-repressor form, its unbinding from DNA slows down, keeping them longer (i.e.,  
262 stored) at non-consensus chromosomal sites (Fig. 5b). On the other hand, when cell transitions to a Zn-  
263 deficient environment that demands derepression of Zn uptake, the cellular Zur protein concentration  
264 goes down. Here unbinding of the holo-repressor would be slower (Fig. 5c), which is undesirable for  
265 derepression, while the unbinding of the apo-form would become faster, releasing them from the non-  
266 consensus “storage” sites on the chromosome into the cytosol (Fig. 5d). If the cytosolic apo-Zur could  
267 possibly facilitate the unbinding of holo-Zur from promoter recognition sites (e.g., through assisted  
268 dissociation), it would give a more facile transition to derepression. To support this possibility, we  
269 measured the apparent unbinding rate constant  $k_d$  for chromosomally encoded  $Zur_{Zn}^{mE}$  in cells that  
270 contains a plasmid encoding an untagged  $Zur_{apo}$  mutant (i.e., C88S). When the expression of this  $Zur_{apo}$   
271 mutant is induced,  $k_d$  of  $Zur_{Zn}^{mE}$  increases by  $\sim 28\%$  at any cellular  $Zur_{Zn}^{mE}$  concentration (Fig. 4b, green  
272 vs. red points), indicating that apo-Zur can indeed facilitate the unbinding of holo-Zur from recognition  
273 sites (Fig. 5e).

274 Multivalent contacts with DNA, which underlie the facilitated unbinding, and salt-bridge  
275 interactions between proteins, which underlie Zur oligomerization and its repressed unbinding, are both  
276 common for protein-DNA and protein-protein interactions, respectively<sup>5, 7, 10, 28-36</sup>. Therefore, the  
277 biphasic unbinding behavior from DNA discovered here for Zur could be broadly relevant to many  
278 other proteins in gene regulation.

279

## 280 METHODS

### 281 Bacterial strains and sample preparation

282 All strains were derived from the *E.coli* BW25113 strain as detailed in Supplementary Note 1.  
283  $Zur^{mE}$  was either encoded at its chromosomal locus via lambda-red homologous recombination<sup>37</sup> or in  
284 a pBAD24 plasmid in a  $\Delta zur$  deletion strain<sup>38</sup>. Mutant forms of Zur ( $Zur_{apo}^{mE}$ ,  $Zur_{D49A}^{mE}$ , or  $Zur_{apo, D49A}^{mE}$ )  
285 were generated via site-directed mutagenesis in pBAD24, which was introduced into the  $\Delta zur$  strain.

286 All cell imaging experiments were done at room temperature in M9 medium supplemented with  
287 amino acids, vitamins, and 0.4% glycerol. 20  $\mu$ M  $ZnSO_4$  was used for Zn stress conditions. The cells  
288 were immobilized on an agarose pad in a sample chamber. Details in Supplementary Note 3.

### 289 SMT and SCQPC

290 SMT and SCQPC were performed on an inverted fluorescence microscope, as reported<sup>11</sup>  
291 (Supplementary Note 3). For SMT, inclined epi-illuminated 405 nm and 561 nm lasers photoconverted  
292 and excited single mEos3.2 molecules, respectively. 561 nm excitation-imaging were in stroboscopic  
293 mode, with 4 ms laser excitation pulses separated by 40 ms time lapse, synchronized with the camera  
294 exposure, so that the mobile proteins still appear as diffraction-limited spots. A custom-written  
295 MATLAB software was used to identify diffraction-limited fluorescence spots and fit them with two-  
296 dimensional Gaussian functions, giving  $\sim 20$  nm localization precision<sup>11, 39</sup>. Time trajectories of positions  
297 and displacement length  $r$  between adjacent images were then extracted.

298 SCQPC was performed after SMT. The remaining proteins were firstly photoconverted to the  
299 red form by a long 405 nm laser illumination. The total cell red fluorescence was then imaged by the  
300 561 nm laser to determine the protein copy number, provided the average fluorescence of a single  
301 mEos3.2 from the earlier SMT. The photoconversion efficiency of mEos3.2<sup>40</sup> and dimeric state of Zur  
302 were accounted for. Cell volumes were determined by fitting their optical transmission image contours  
303 with the model geometry of a cylinder with two hemispherical caps.

### 304 Resolution of diffusion states

305 The effective diffusion constants and the fractional populations of diffusion states were  
 306 extracted by analyzing the CDF of displacement length  $r$  per time-lapse ( $T_{tl} = 40$  ms), using a linear  
 307 combination of three diffusion terms of CDF, as reported<sup>11</sup> (Equation (3)). Each term is from a 2-D  
 308 Brownian diffusion model<sup>18, 41, 42</sup>, which was regularly used to analyze SMT results of proteins in  
 309 bacterial and mammalian cells<sup>18, 21, 42-46</sup> (model justification in Supplementary Note 4).

$$\begin{aligned} \text{CDF}(r) = & A_{\text{FD}} \left( 1 - \exp \left( -\frac{r^2}{4D_{\text{FD}}T_{tl}} \right) \right) + A_{\text{NB}} \left( 1 - \exp \left( -\frac{r^2}{4D_{\text{NB}}T_{tl}} \right) \right) \\ & + (1 - A_{\text{FD}} - A_{\text{NB}}) \left( 1 - \exp \left( -\frac{r^2}{4D_{\text{TB}}T_{tl}} \right) \right) \end{aligned} \quad (3)$$

310 We globally fitted the CDFs across groups of cells of different cellular protein concentrations, in which  
 311 the diffusion constants ( $D$ 's) of respective diffusion states were shared but their fractional populations  
 312 ( $A$ 's) were allowed to vary. Three terms were always the minimal number of diffusion states to  
 313 satisfactorily fit the CDF (details in Supplementary Note 4 and Supplementary Tables 4-5).

314 Note these diffusion constant values are not the intrinsic ones, as they are influenced by the  
 315 cell confinement effect<sup>47</sup>, which decreases the magnitude of the apparent diffusion constant, and by the  
 316 time-lapse effect of imaging, where longer time lapse gives apparently smaller diffusion constants; both  
 317 of these effects are most significant on the FD state, less on the NB state, and negligible on the TB state,  
 318 and were evaluated quantitatively in a previous study of metal-responsive transcription regulators of a  
 319 different family<sup>11</sup>.

### 320 Determination and analysis of $k_d$

321 A three-state (FD, NB, and TB state) kinetic model, including the interconversion between  
 322 states and photobleaching/blinking rates (Fig. 2c), was used to analyze the distribution of residence  
 323 times (upper thresholded by  $r_0$ ; Fig. 2a) at chromosomal TB sites to extract the apparent unbinding rate  
 324 constant  $k_d$ . The respective residence time distribution functions  $\varphi(\tau)$  for the FD, NB, and TB states with  
 325 given diffusion constants ( $D$ 's), the unbinding rate constant from the NB state  $k_{-2}$ , and  
 326 photobleaching/blinking rate constant  $k_{bl}$  were derived to fit the  $\tau$  distribution with the overall  
 327 distribution function  $\varphi_{\text{all}}(\tau)$  (Eq. (4); Supplementary Note 5).

328

$$\varphi_{\text{all}}(\tau) = A_{\text{FD}}\varphi_{\text{FD}}(\tau) + A_{\text{NB}}\varphi_{\text{NB}}(\tau) + A_{\text{TB}}\varphi_{\text{TB}}(\tau) \quad (4)$$

$$\varphi_{\text{FD}}(\tau) = \left[ \frac{r_0^2}{4D_{\text{FD}}\tau^2} \exp \left( -\frac{r_0^2}{4D_{\text{FD}}\tau} \right) + k_{\text{eff}}^{\text{FD}} \left( 1 - \exp \left( -\frac{r_0^2}{4D_{\text{FD}}\tau} \right) \right) \right] \exp(-k_{\text{eff}}^{\text{FD}}\tau) \quad (5)$$

$$\varphi_{\text{NB}}(\tau) = \left[ \frac{r_0^2}{4D_{\text{NB}}\tau^2} \exp \left( -\frac{r_0^2}{4D_{\text{NB}}\tau} \right) + k_{\text{eff}}^{\text{NB}} \left( 1 - \exp \left( -\frac{r_0^2}{4D_{\text{NB}}\tau} \right) \right) \right] \exp(-k_{\text{eff}}^{\text{NB}}\tau) \quad (6)$$

$$\varphi_{\text{TB}}(\tau) = k_{\text{eff}}^{\text{TB}} \exp(-k_{\text{eff}}^{\text{TB}}\tau) \quad (7)$$

329 Here  $k_{\text{eff}}^{\text{FD}} = k_{bl} \frac{T_{\text{int}}}{T_{tl}}$ ,  $k_{\text{eff}}^{\text{NB}} = k_{bl} \frac{T_{\text{int}}}{T_{tl}} + k_{-2}$ ,  $k_{\text{eff}}^{\text{TB}} = k_{bl} \frac{T_{\text{int}}}{T_{tl}} + k_d$ , and  $A_i$  is the fractional population of  $i^{\text{th}}$ -state.

330 The dependence of  $k_d$  on the cellular free diffusing protein concentration  $[P]_{\text{FD}}$  was analyzed  
 331 with Eq. (2), containing three terms representing spontaneous, repressed, and facilitated unbinding with  
 332 the corresponding rate constants  $k_0^{\text{off}}$ ,  $k_r$ , and  $k_f$ , respectively (derivation in Supplementary Note 6).

### 333 Analysis of relative populations

334 The same three-state kinetic model (Fig. 2c) was used to analyze the relative populations of  
 335 FD, NB, and TB states of Zur across all cellular protein concentrations.



336 Oligomerization/deoligomerization of Zur at a TB site was modeled as 1-D sequential  
 337 binding/unbinding, analogous to the Brunauer-Emmett-Teller multilayer-adsorption theory<sup>48</sup> but with a  
 338 limited number  $n_0$  of binding site and merely one binding rate constant  $k_1$  (see Supplementary Note 7  
 339 for detailed derivation). Quasi-equilibrium approximation of interconversion among states was used,  
 340 which approximates that the timescale of interconversion between states (~ms) are much shorter than  
 341 the experimental imaging time (~hours). The kinetic parameters are then related to the relative  
 342 concentrations of the proteins at three diffusion states.

$$\frac{[\text{PD}]_{\text{TB}}}{[\text{P}]_{\text{FD}}} = \frac{k_1 [\text{D}_0]_{\text{TB}}}{k_d} \frac{\partial \ln F_{\text{TB} \leftarrow \text{FD}}(x_{\text{TB} \leftarrow \text{FD}})}{\partial x_{\text{TB} \leftarrow \text{FD}}} \quad (8)$$

$$\frac{[\text{PD}]_{\text{TB}}}{[\text{P}]_{\text{NB}}} = \frac{k_3 [\text{D}_0]_{\text{TB}}}{k_{-3} ([\text{D}_0]_{\text{NB}} - [\text{PD}]_{\text{NB}})} \frac{\partial \ln F_{\text{TB} \leftarrow \text{NB}}(x_{\text{TB} \leftarrow \text{NB}})}{\partial x_{\text{TB} \leftarrow \text{NB}}} \quad (9)$$

$$\frac{[\text{PD}]_{\text{NB}}}{[\text{P}]_{\text{FD}}} = \frac{k_2 [\text{D}_0]_{\text{NB}}}{k_{-2} + k_2 [\text{P}]_{\text{FD}}} \quad (10)$$

343 Here  $[\text{P}]_{\text{FD}}$ ,  $[\text{PD}]_{\text{NB}}$ , and  $[\text{PD}]_{\text{TB}}$  are the cellular protein concentrations of FD, NB, and TB states,

344 respectively.  $F_{\text{TB} \leftarrow j}(x_{\text{TB} \leftarrow j}) \equiv \sum_{i=0}^{n_0} x_{\text{TB} \leftarrow j}^i, j \in [\text{FD}, \text{NB}]$ , where  $x_{\text{TB} \leftarrow \text{FD}} \equiv \frac{k_1}{k_d} [\text{P}]_{\text{FD}}$  and

345  $x_{\text{TB} \leftarrow \text{NB}} \equiv \frac{k_3}{k_{-3} ([\text{D}_0]_{\text{NB}} - [\text{PD}]_{\text{NB}})} [\text{PD}]_{\text{NB}}$ .  $[\text{D}_0]_{\text{TB}}$  and  $[\text{D}_0]_{\text{NB}}$  are the effective cellular concentrations

346 of TB and NB sites, respectively. Thermodynamic quantities such as the dissociation constant of TB  
 347 ( $K_{d1} = \frac{k_0^{\text{off}}}{k_1}$ ) and NB ( $K_{d2} = \frac{k_{-2}}{k_2}$ ) were also determined from this analysis.

348

## 349 REFERENCES

- 350 1. Schramm, L. & Hernandez, N. Recruitment of RNA polymerase III to its target promoters.  
 351 *Genes Dev.* **16**, 2593-2620 (2002).  
 352 2. Deuschle, U., Gentz, R. & Bujard, H. lac Repressor blocks transcribing RNA polymerase and  
 353 terminates transcription. *Proc. Natl Acad. Sci. USA* **83**, 4134-4137 (1986).  
 354 3. Rajagopalan, S. et al. Studies of IscR reveal a unique mechanism for metal-dependent  
 355 regulation of DNA binding specificity. *Nat. Struct. Mol. Biol.* **20**, 740-747 (2013).  
 356 4. Nesbit, A. D., Giel, J. L., Rose, J. C. & Kiley, P. J. Sequence-specific binding to a subset of  
 357 IscR-regulated promoters does not require IscR Fe-S cluster ligation. *J. Mol. Biol.* **387**, 28-41  
 358 (2009).  
 359 5. Chen, T. Y., Cheng, Y. S., Huang, P. S. & Chen, P. Facilitated Unbinding via Multivalency-  
 360 Enabled Ternary Complexes: New Paradigm for Protein-DNA Interactions. *Acc. Chem. Res.* **51**,  
 361 860-868 (2018).  
 362 6. Graham, J. S., Johnson, R. C. & Marko, J. F. Concentration-dependent exchange accelerates  
 363 turnover of proteins bound to double-stranded DNA. *Nucleic Acids Res.* **39**, 2249-2259 (2011).  
 364 7. Gibb, B. et al. Concentration-dependent exchange of replication protein A on single-stranded  
 365 DNA revealed by single-molecule imaging. *PLoS One* **9**, e87922 (2014).  
 366 8. Geertsema, H. J., Kulczyk, A. W., Richardson, C. C. & van Oijen, A. M. Single-molecule  
 367 studies of polymerase dynamics and stoichiometry at the bacteriophage T7 replication  
 368 machinery. *Proc. Natl Acad. Sci. USA* **111**, 4073-4078 (2014).  
 369 9. Lewis, J. S. et al. Single-molecule visualization of fast polymerase turnover in the bacterial  
 370 replisome. *eLife* **6** (2017).

- 371 10. Joshi, C. P. et al. Direct substitution and assisted dissociation pathways for turning off  
372 transcription by a MerR-family metalloregulator. *Proc. Natl Acad. Sci. USA* **109**, 15121-15126  
373 (2012).
- 374 11. Chen, T. Y. et al. Concentration- and chromosome-organization-dependent regulator unbinding  
375 from DNA for transcription regulation in living cells. *Nat. Commun.* **6**, 7445 (2015).
- 376 12. Hantke, K. Bacterial zinc uptake and regulators. *Curr. Opin. Microbiol.* **8**, 196-202 (2005).
- 377 13. Hemm, M. R. et al. Small stress response proteins in Escherichia coli: proteins missed by  
378 classical proteomic studies. *J. Bacteriol.* **192**, 46-58 (2010).
- 379 14. Panina, E. M., Mironov, A. A. & Gelfand, M. S. Comparative genomics of bacterial zinc  
380 regulons: enhanced ion transport, pathogenesis, and rearrangement of ribosomal proteins. *Proc.*  
381 *Natl Acad. Sci. USA* **100**, 9912-9917 (2003).
- 382 15. Gilston, B. A. et al. Structural and mechanistic basis of zinc regulation across the E. coli Zur  
383 regulon. *PLoS Biol.* **12**, e1001987 (2014).
- 384 16. Zhang, M. et al. Rational design of true monomeric and bright photoactivatable fluorescent  
385 proteins. *Nat. Methods* **9**, 727-729 (2012).
- 386 17. McKinney, S. A. et al. A bright and photostable photoconvertible fluorescent protein. *Nat.*  
387 *Methods* **6**, 131-133 (2009).
- 388 18. Elf, J., Li, G. W. & Xie, X. S. Probing transcription factor dynamics at the single-molecule level  
389 in a living cell. *Science* **316**, 1191-1194 (2007).
- 390 19. Javer, A. et al. Short-time movement of E. coli chromosomal loci depends on coordinate and  
391 subcellular localization. *Nat. Commun.* **4**, 3003 (2013).
- 392 20. Mehta, P. et al. Dynamics and stoichiometry of a regulated enhancer-binding protein in live  
393 Escherichia coli cells. *Nat. Commun.* **4**, 1997 (2013).
- 394 21. Uphoff, S. et al. Single-molecule DNA repair in live bacteria. *Proc. Natl Acad. Sci. USA* **110**,  
395 8063-8068 (2013).
- 396 22. Mazza, D., Ganguly, S. & McNally, J. G. Monitoring dynamic binding of chromatin proteins  
397 in vivo by single-molecule tracking. *Methods Mol. Biol.* **1042**, 117-137 (2013).
- 398 23. Ma, Z., Gabriel, S. E. & Helmann, J. D. Sequential binding and sensing of Zn(II) by Bacillus  
399 subtilis Zur. *Nucleic Acids Res.* **39**, 9130-9138 (2011).
- 400 24. Chen, P. et al. Single-molecule dynamics and mechanisms of metalloregulators and  
401 metallochaperones. *Biochemistry* **52**, 7170-7183 (2013).
- 402 25. Choi, S. H. et al. Zinc-dependent regulation of zinc import and export genes by Zur. *Nat.*  
403 *Commun.* **8**, 15812 (2017).
- 404 26. Wang, W. et al. Chromosome organization by a nucleoid-associated protein in live bacteria.  
405 *Science* **333**, 1445-1449 (2011).
- 406 27. Prestel, E., Noirot, P. & Auger, S. Genome-wide identification of Bacillus subtilis Zur-binding  
407 sites associated with a Zur box expands its known regulatory network. *BMC Microbiol.* **15**, 13  
408 (2015).
- 409 28. Hadizadeh, N., Johnson, R. C. & Marko, J. F. Facilitated Dissociation of a Nucleoid Protein  
410 from the Bacterial Chromosome. *J. Bacteriol.* **198**, 1735-1742 (2016).
- 411 29. Geertsema, H. J., Kulczyk, A. W., Richardson, C. C. & van Oijen, A. M. Single-molecule  
412 studies of polymerase dynamics and stoichiometry at the bacteriophage T7 replication  
413 machinery. *Proc. Natl Acad. Sci. USA* **111**, 4073-4078 (2014).
- 414 30. Norel, R., Sheinerman, F., Petrey, D. & Honig, B. Electrostatic contributions to protein-protein  
415 interactions: fast energetic filters for docking and their physical basis. *Protein Sci.* **10**, 2147-  
416 2161 (2001).
- 417 31. Xu, D., Tsai, C. J. & Nussinov, R. Hydrogen bonds and salt bridges across protein-protein  
418 interfaces. *Protein Eng.* **10**, 999-1012 (1997).
- 419 32. Zhang, Z., Witham, S. & Alexov, E. On the role of electrostatics in protein-protein interactions.  
420 *Phys. Biol.* **8**, 035001 (2011).
- 421 33. Persson, B. A. & Lund, M. Association and electrostatic steering of alpha-lactalbumin-  
422 lysozyme heterodimers. *Phys. Chem. Chem. Phys.* **11**, 8879-8885 (2009).
- 423 34. Gunasekaran, K. et al. Enhancing antibody Fc heterodimer formation through electrostatic  
424 steering effects: applications to bispecific molecules and monovalent IgG. *J. Biol. Chem.* **285**,

- 19637-19646 (2010).
- 426 35. Persson, B. A., Jonsson, B. & Lund, M. Enhanced protein steering: cooperative electrostatic  
427 and van der Waals forces in antigen-antibody complexes. *J. Phys. Chem. B* **113**, 10459-10464  
428 (2009).
- 429 36. Hemsath, L. et al. An electrostatic steering mechanism of Cdc42 recognition by Wiskott-  
430 Aldrich syndrome proteins. *Mol. Cell* **20**, 313-324 (2005).
- 431 37. Datsenko, K. A. & Wanner, B. L. One-step inactivation of chromosomal genes in Escherichia  
432 coli K-12 using PCR products. *Proc. Natl Acad. Sci. USA* **97**, 6640-6645 (2000).
- 433 38. Guzman, L. M., Belin, D., Carson, M. J. & Beckwith, J. Tight regulation, modulation, and high-  
434 level expression by vectors containing the arabinose PBAD promoter. *J. Bacteriol.* **177**, 4121-  
435 4130 (1995).
- 436 39. Thompson, R. E., Larson, D. R. & Webb, W. W. Precise Nanometer Localization Analysis for  
437 Individual Fluorescent Probes. *Biophys. J.* **82**, 2775-2783 (2002).
- 438 40. Durisic, N. et al. Single-molecule evaluation of fluorescent protein photoactivation efficiency  
439 using an in vivo nanotemplate. *Nat. Methods* **11**, 156-162 (2014).
- 440 41. Fick, A. V. On liquid diffusion. *The London, Edinburgh, and Dublin Philosophical Magazine*  
441 *and Journal of Science* **10**, 30-39 (1855).
- 442 42. Gebhardt, J. C. et al. Single-molecule imaging of transcription factor binding to DNA in live  
443 mammalian cells. *Nat. Methods* **10**, 421-426 (2013).
- 444 43. English, B. P. et al. Single-molecule investigations of the stringent response machinery in living  
445 bacterial cells. *Proc. Natl Acad. Sci. USA* **108**, E365-373 (2011).
- 446 44. Mazza, D. et al. A benchmark for chromatin binding measurements in live cells. *Nucleic Acids*  
447 *Res.* **40**, e119 (2012).
- 448 45. Niu, L. & Yu, J. Investigating intracellular dynamics of FtsZ cytoskeleton with photoactivation  
449 single-molecule tracking. *Biophys. J.* **95**, 2009-2016 (2008).
- 450 46. Mueller, F., Stasevich, T. J., Mazza, D. & McNally, J. G. Quantifying transcription factor  
451 kinetics: at work or at play? *Crit. Rev. Biochem. Mol. Biol.* **48**, 492-514 (2013).
- 452 47. Chen, T. Y. et al. Quantifying Multistate Cytoplasmic Molecular Diffusion in Bacterial Cells  
453 via Inverse Transform of Confined Displacement Distribution. *J. Phys. Chem. B* **119**, 14451-  
454 14459 (2015).
- 455 48. Brunauer, S., Emmett, P. H. & Teller, E. Adsorption of Gases in Multimolecular Layers. *J. Am.*  
456 *Chem. Soc.* **60**, 309-319 (1938).

457

## 458 **Acknowledgements**

459 This research is supported by the National Institutes of Health (GM109993). We thank A. G.  
460 Santiago for providing molecular biology protocols and materials, T.-Y. Chen for providing iqPALM  
461 MATLAB codes, Y. Aye and C. Kinsland for access to biology facilities, and J. D. Helmann for  
462 discussion.

463

## 464 **Author contributions**

465 W.J. and P.C. designed research; W.J. performed experiments, derived theory, coded software,  
466 and analyzed data; W.J. and P.C. discussed the results and wrote the manuscript.

## 467 **Competing interests**

468 The authors declare no competing interest.

## 469 **Additional information**

470 **Supplementary information** is available for this paper.

471

472

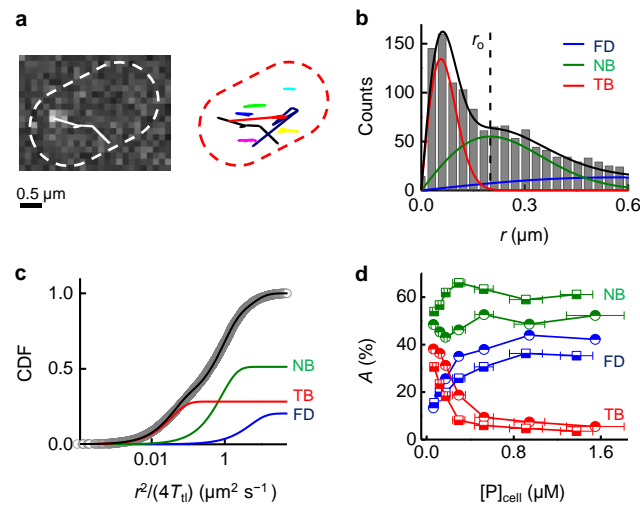

473

474 **Fig. 1 | SMT of Zur in living cells.** **a**, Left: exemplary fluorescence image of a single  $Zur_{apo}^{mE}$  protein  
 475 in a live *E. coli* cell overlaid with its position trajectory (solid line). Right: overlay of many trajectories.  
 476 Dash lines: cell boundary. **b**, Histogram of displacement length  $r$  per time-lapse (40 ms) of > 1,400  
 477 tracked  $Zur_{apo}^{mE}$  proteins at  $124 \pm 15$  nM. Solid lines: the overall fitted distribution (black), and the  
 478 resolved FD (blue), NB (green), and TB (red) diffusion states (Supplementary Note 4). Vertical dashed  
 479 line:  $r_o = 0.2 \mu\text{m}$  for extracting residence times as in Fig. 2a. **c**, Cumulative-distribution-function (CDF)  
 480 of  $r$  (plotted against  $\frac{r^2}{4T_{tl}}$ ) as in **b**. Lines: overall fit (Eq. (3)) and three resolved diffusion states with  
 481 effective diffusion constants (and fractional populations):  $D_{FD} = 5.0 \pm 0.5 \mu\text{m}^2 \text{s}^{-1}$  ( $21.7 \pm 0.4\%$ ),  $D_{NB} =$   
 482  $0.8 \pm 0.05 \mu\text{m}^2 \text{s}^{-1}$  ( $48.8 \pm 0.4\%$ ), and  $D_{TB} = 0.040 \pm 0.003 \mu\text{m}^2 \text{s}^{-1}$  ( $30.1 \pm 0.5\%$ ). **d**, Fractional  
 483 populations of FD, NB, and TB states for  $Zur_{apo}^{mE}$  (half-solid squares) and  $Zur_{Zn}^{mE}$  (half-solid circles)  
 484 vs. the cellular protein concentrations.

485

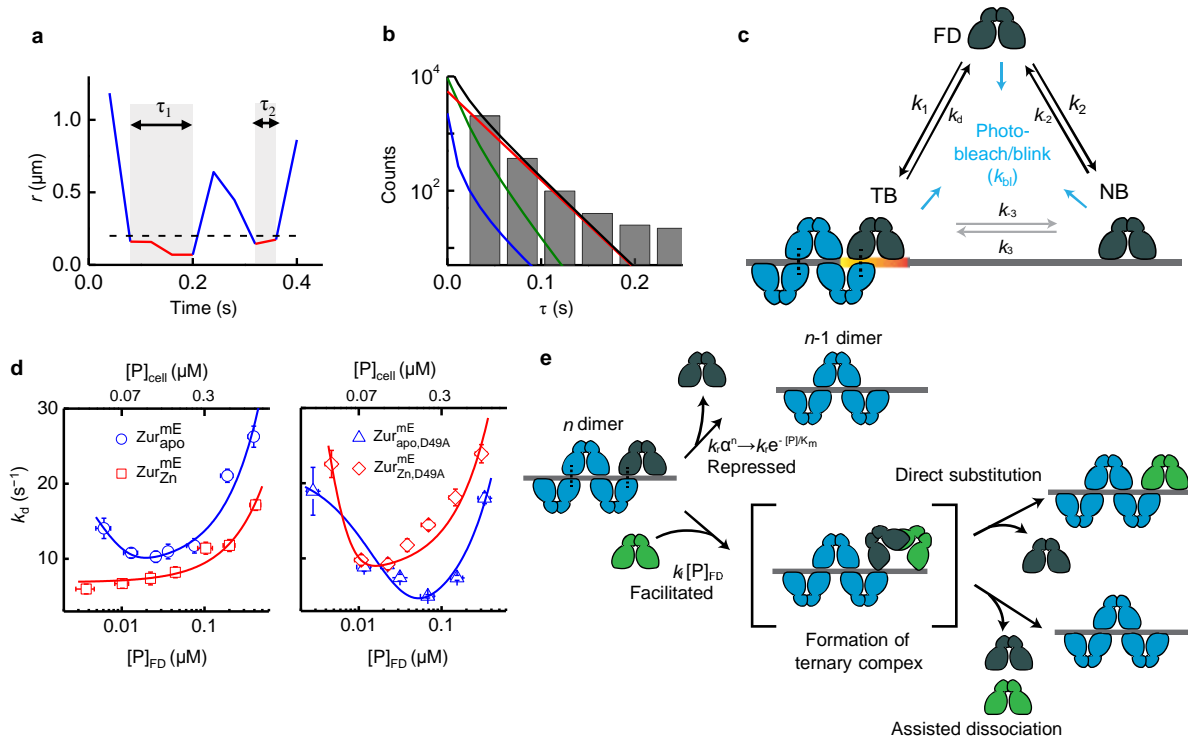

486

487 **Fig. 2 | Biphasic unbinding kinetics of Zur from TB sites on chromosome.** **a**, Time trajectory of  
 488 displacement length  $r$  per time-lapse from a single  $Zur_{apo}^{mE}$  protein. Two microscopic residence time  $\tau$   
 489 shown in gray shades; dashed horizontal line: displacement threshold  $r_o = 0.2 \mu\text{m}$  (vertical dashed line  
 490 in Fig. 1b). **b**, Histogram of  $\tau$  for  $Zur_{apo}^{mE}$  at the cellular concentration of  $124 \pm 15 \text{ nM}$ . Black line:  
 491 fitting with Eq. (4). Contributions of the three diffusion states are plotted, as color-coded in Fig. 1b-c.  
 492 **c**, Three-state model of a single Zur protein interacting with DNA in a cell.  $k$ 's are the rate constants. **d**,  
 493 Protein-concentration-dependent  $k_d$  for  $Zur_{apo}^{mE}$  and  $Zur_{Zn}^{mE}$  (left) and their corresponding D49A salt-  
 494 bridge mutants (right). Bottom/top axis refers to free/cellular protein concentration, respectively. Lines  
 495 are fits with Eq. (2). All error bars are s.d. **e**, Schematic molecular mechanisms for biphasic unbinding  
 496 of Zur from a TB site. A bound Zur protein (dark blue) within an oligomer on DNA can unbind  
 497 following either a repressed pathway (top) due to the presence of  $(n-1)$  proteins nearby or a facilitated  
 498 pathway (bottom) upon binding another protein (green) to form an intermediate ternary complex, which  
 499 then proceeds through direct substitution or assist dissociation pathway. Black dashed lines denote salt-  
 500 bridge interactions.

501

502



503

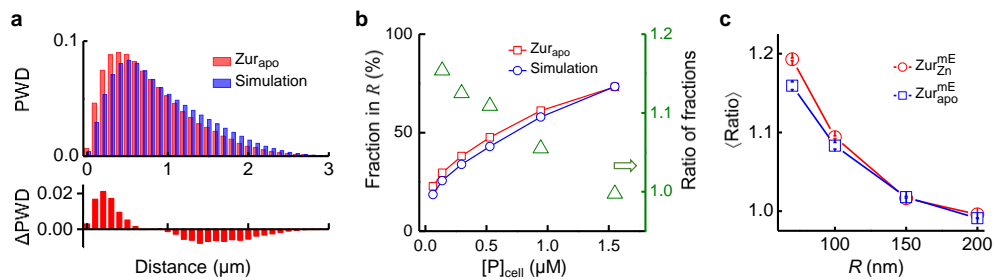

504

505 **Fig. 3 | Spatial analysis of Zur's residence sites. a**, Normalized pair-wise distance distributions (PWD)  
 506 of residence sites for  $Zur_{apo}^{mE}$  and for simulated random sites in the cell (top), and the difference of  
 507  $Zur_{apo}^{mE}$  from simulation (bottom). **b**, Fraction of residence sites within a radius threshold  $R$  ( $= 100$  nm,  
 508 left axis) for  $Zur_{apo}^{mE}$  and for simulated random sites as a function of cellular protein concentration.  
 509 Their ratio ( $Zur_{apo}^{mE}$  vs. simulation) is plotted against the right axis. **c**, Dependence of the average ratio  
 510 in **b** across all protein concentrations as a function of the radius threshold  $R$  for  $Zur_{apo}^{mE}$  and  $Zur_{Zn}^{mE}$ .

511

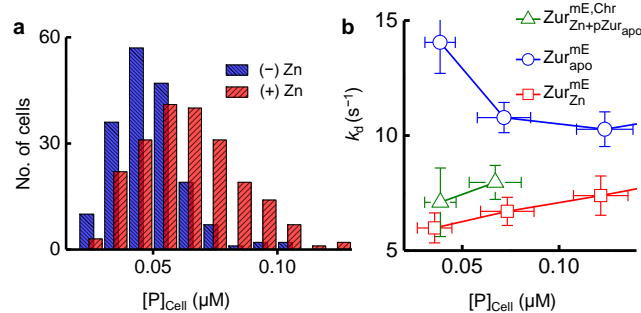

512

513 **Fig. 4 | Zur behaviors within the physiological range of cellular protein concentrations. a**,  
 514 Distribution of the chromosomally expressed  $Zur^{mE}$  concentration in the cell with (+) and without (-)  
 515 Zn stress in the medium. **b**, Dependence of  $k_d$  on the protein concentration in the cell for  $Zur_{apo}^{mE}$ ,  $Zur_{Zn}^{mE}$ ,  
 516 and for  $Zur_{Zn}^{mE}$  together with a plasmid expressing  $Zur_{apo}$  (i.e.  $Zur_{Zn}^{mE,Chr} + pZur_{apo}$ ) when the mE-tagged Zur  
 517 is only encoded on the chromosome. The blue circles and red squares for  $Zur_{apo}^{mE}$  and  $Zur_{Zn}^{mE}$  are part  
 518 of data in Fig. 2d (left).

519

520

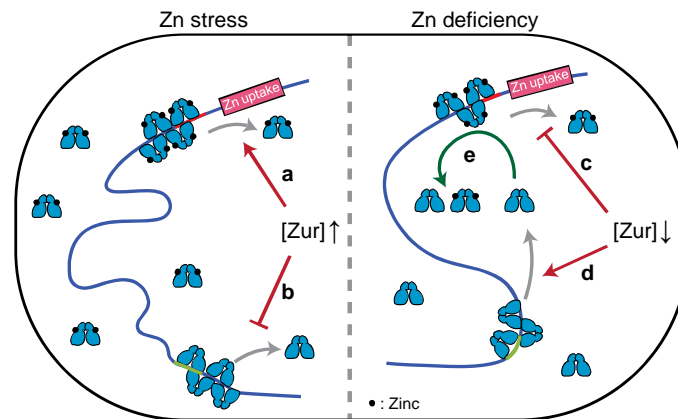

521

522 **Fig. 5 | Functional model of holo- and apo-Zur unbinding behaviors in *E. coli* upon encountering**  
 523 **zinc stress or deficiency.** Upon zinc stress, unbinding of holo-Zur from operator site is facilitated (a)  
 524 while that of apo-Zur from storage site is repressed (b) due to increase in cellular protein concentration.  
 525 Upon zinc deficiency, the facilitated unbinding of holo-Zur is attenuated (c) while the unbinding of apo-  
 526 Zur is less repressed (d) due to decrease in cellular protein concentration. Released apo-Zur into cytosol  
 527 could facilitate holo-Zur to unbind (e), helping transition to de-repression of zinc uptake.

528

| <b>Table 1   Kinetic and thermodynamic parameters for Zur-DNA interaction in <i>E. coli</i> cells</b> |                   |                                  |                                 |                                        |                                       |
|-------------------------------------------------------------------------------------------------------|-------------------|----------------------------------|---------------------------------|----------------------------------------|---------------------------------------|
|                                                                                                       | Zur <sup>mE</sup> | Zur <sup>mE</sup> <sub>apo</sub> | Zur <sup>mE</sup> <sub>Zn</sub> | Zur <sup>mE</sup> <sub>apo, D49A</sub> | Zur <sup>mE</sup> <sub>Zn, D49A</sub> |
| $k_1$ (nM <sup>-1</sup> s <sup>-1</sup> ) <sup>a</sup>                                                | 1.90 ± 0.17       | 1.84 ± 0.20                      | 1.10 ± 0.18                     | 1.61 ± 0.58                            | 1.30 ± 0.19                           |
| $k_0^{\text{off}}$ (s <sup>-1</sup> )                                                                 | 25 ± 12           | 22 ± 21                          | 5.4 ± 0.6                       | 22.1 ± 1.5                             | 36 ± 41                               |
| $k_r$ (s <sup>-1</sup> )                                                                              | 16 ± 11           | 12 ± 20                          | n/o <sup>b</sup>                | 20.8 ± 1.3                             | 27 ± 40                               |
| $k_f$ (nM <sup>-1</sup> s <sup>-1</sup> )                                                             | 0.028 ± 0.005     | 0.044 ± 0.007                    | 0.026 ± 0.033                   | 0.049 ± 0.014                          | 0.062 ± 0.010                         |
| $K_m$ (nM)                                                                                            | 6.0 ± 4.0         | 4.9 ± 7.3                        | n/o <sup>b</sup>                | 16.2 ± 7.5                             | 3.2 ± 1.9                             |
| $K_{d1}$ (= $k_0^{\text{off}}/k_1$ ) (nM) <sup>a</sup>                                                | 12.9 ± 6.2        | 11.7 ± 11.2                      | 4.9 ± 1.2                       | 13.7 ± 5.0                             | 28 ± 20                               |
| $K_{d2}$ (= $k_{-2}/k_2$ ) (nM) <sup>a</sup>                                                          | 417 ± 35          | 348 ± 84                         | 534 ± 148                       | 209 ± 69                               | 532 ± 134                             |
| $K_{d3}$ (= $k_{-3}/k_3$ ) <sup>a</sup>                                                               | 0.011 ± 0.002     | 0.023 ± 0.007                    | 0.022 ± 0.023                   | 0.032 ± 0.062                          | 0.008 ± 0.006                         |
| [D <sub>0</sub> ] <sub>NB</sub> (nM) <sup>a</sup>                                                     | 1144 ± 84         | 961 ± 205                        | 1201 ± 287                      | 858 ± 230                              | 1538 ± 353                            |
| [D <sub>0</sub> ] <sub>TB</sub> · $n_o$ (nM) <sup>a</sup>                                             | 42.56 ± 0.94      | 34.3 ± 3.2                       | 54 ± 14                         | 31.6 ± 5.1                             | 38.8 ± 3.8                            |

<sup>a</sup>  $n_o = 5$  was used in fitting.  
<sup>b</sup> Not observed

529

### 530 TOC Graph

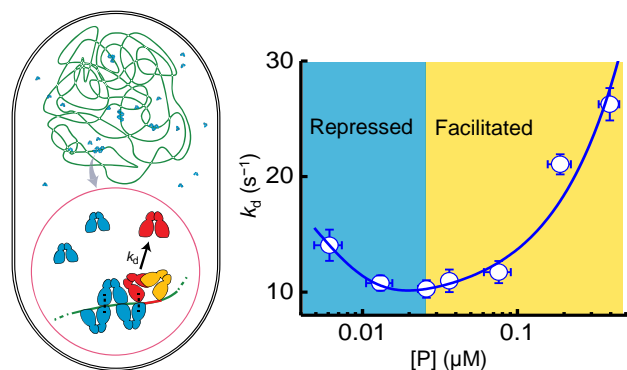

531
